# Supplementary material for: Differential Gene Expression Analysis of Bovine Macrophages after Exposure to the Penicillium Mycotoxins Citrinin and/or Ochratoxin A
Source: MDPI journal article supplement (doi:10.3390/toxins9110366), 2017-11-13
Supplement: s1 [file s1]

# Supplementary Materials: Differential Gene Expression Analysis of Bovine Macrophages after Exposure to the *Penicillium* Mycotoxins Citrinin and/or Ochratoxin A

Kristen M. Brennan, Se-Young Oh, Alexandros Yiannikouris, Daniel E. Graugnard and Niel A. Karrow

**Table S3.** Validation of changes in relative expression of selected genes<sup>1</sup> in bovine macrophage (BoMac) cells exposed to citrinin (CIT), ochratoxin A (OTA) or CIT+OTA at (A) 6 h and (B) 24 h.

| Exposure time | Gene    | CIT        |        | OTA        |        | CIT+OTA    |        |
|---------------|---------|------------|--------|------------|--------|------------|--------|
|               |         | Microarray | RT-PCR | Microarray | RT-PCR | Microarray | RT-PCR |
| 6 h           | CCDN3   | -1.21      | -1.91  | -1.45      | -2.5   | -1.61      | -3.34  |
|               | TUBB4B  | -1.81      | -1.88  | -1.4       | -1.81  | -2.05      | -4.15  |
|               | SLC15A1 | 1.41       | 1.34   | 2.38       | 1.91   | 1.41       | 1.50   |
| 24h           | SLC35C1 | -1.46      | -1.33  | -4.71      | -5.96  | -3.1       | -3.70  |
|               | SFXN3   | -1.24      | -1.01  | -3.8       | -4.06  | -1.73      | -1.69  |
|               | TIMP2   | 1.10       | 1.28   | 1.37       | 2.29   | 1.51       | 2.41   |

<sup>1</sup>Selected genes: CCDN3 = cyclin D; TUBB4B = tubulin beta 4B, SLC15A1 = solute carrier family 14, member A1; SLC35C1 = solute carrier family 35, member C1; SFXN3 = sideroflexin 3; TIMP2 = TIMP metalloproteinase inhibitor 2
